# Supplementary material
Source: PubMed Central journal article supplement (PMC1803721)
Supplement: plntphys_pp.106.085555_2.pdf [file plntphys_pp.106.085555_2.pdf]

## Supplemental figure captions

**Supplemental Figure 1.** Radio-HPLC analyses of the products of *E. coli* IPMS. A, Incubation with 500  $\mu$ M [ $^{14}$ C]acetyl-CoA and 3 mM 2-oxoisovalerate shows [ $^{14}$ C]-2-isopropylmalate (IPM) as the only radioactive labelled product. B, Incubation with 4-methylthio-2-oxobutyrate and [ $^{14}$ C]acetyl-CoA yields a small amount of [ $^{14}$ C]-2-(2'-methylthio)ethylmalate (MTEM), whereas most of the [ $^{14}$ C]acetyl-CoA (Ac-CoA) remains unconverted. C, In the absence of 2-oxo-acid substrate, a small amount of [ $^{14}$ C]acetate (Ac) is formed, whereas most of the [ $^{14}$ C]acetyl-CoA (Ac-CoA) remains intact.

**Supplemental Figure 2.** Predicted positions of the T-DNA inserts (vertical arrows) in the Salk insertional mutant lines for *IPMS1* (Salk\_101771) and *IPMS2* (Salk\_051060 and Salk\_000074). The genes are shown with 5'-UTR and 3'-UTR (grey boxes), exons (black boxes) and introns (lines in between boxes).

**Supplemental Figure 3.** Analyses of the glucosinolate content (3MSOP = 3-methylsulfinylpropyl; 4MSOB = 4-methylsulfinylbutyl; 7-MSOH = 7-methylsulfinylheptyl; 4MTB = 4-methylthiobutyl; 8MSOO = 8-methylsulfinyloctyl; I3M = indol-3-ylmethyl; 4MOI3M = 4-methoxyindol-3-ylmethyl; 1MOI3M = 1-methoxyindol-3-ylmethyl) of homozygous T-DNA insertion lines for *IPMS1* (A, Salk\_101771 [mm]) and *IPMS2* (B, Salk\_051060 [mm] and Salk\_000074 [mm]). The *IPMS* mutants show no significant changes in glucosinolate content in comparison with the corresponding outsegregants (ww) and Col-0 wildtype. Error bars indicate standard deviation.

## Supplemental Figure 4.

Semi-quantitative RT-PCR analysis of *IPMS1* and *IPMS2* gene expression in various plant tissues of *A. thaliana*. RNA was extracted from organs of 6-week old plants (rt, root; ml mature leaf; el, expanding leaf; cl, cauline leaf; s1, primary stem; s2, secondary stem; fl, inflorescence; si, silique) and converted to cDNA using RT and oligo dT as a primer. PCR using the cDNA as a template were done in triplicate with the primers listed in Supplemental Table 1. Average fluorescence intensities of the ethidium- bromide stained gel bands were normalized relative to that of *ACT8* (At1g49240).

**Supplemental Figure 5.** A, Expression levels of *IPMS1* and *IPMS2* in different plant tissues according to the Gene Atlas tool of GENEVESTIGATOR. Anatomical descriptions on the x-axis are based on standard terms (<http://www.plantontology.org>) with the numbers indicating a classification into six main groups and the corresponding subgroups. The numbers in parentheses represent the number of micro-arrays for each tissue or growth stage. B, Expression levels of *IPMS1* and *IPMS2* at various growth stages according the Gene Chronologer tool. The numbers on the x-axis indicate the age in days. The symbols represent the following nine successive growth stages: seed germination, development of first 2 rosette leaves, development of 3-5 rosette leaves, rosette growth to 20% of final size, rosette growth to 50% final size, inflorescence emergence, opening of 10% of flower buds to be produced, opening of 50% of flower buds, flowering completed and first silique shattered. The error bars depict standard errors. A signal intensity of 1000 is the target value used for normalization of all chip data in the GENEVESTIGATOR-program and signal intensities higher than 200 are considered to be above background level.

**Supplemental Table I.** Oligonucleotide primers used in this study

| Name                     | Sequence (5'→3')                         | Purpose                                                                              |
|--------------------------|------------------------------------------|--------------------------------------------------------------------------------------|
| LBa1 <sup>a</sup>        | TGGTTCACGTAGTGGGCCATCG                   | Screening Salk lines for T-DNA insertion                                             |
| ipms1for <sup>a</sup>    | GCCTAACGGTCTCTTTTCTTCAT                  | Genomic screening of S101771                                                         |
| ipms1rev <sup>a</sup>    | TTTTTCTGCTCAGCCACGGTTTT                  | Genomic screening of S101771                                                         |
| 2ipms2d <sup>c</sup>     | TTGATCTCTGAGATTTGCAGGTA                  | Genomic Screening of S000074                                                         |
| 1ipms2w <sup>b</sup>     | GGGTTCTAATCCGCGGAGA                      | Genomic screening of S000074                                                         |
| 1ipms2t <sup>b</sup>     | TGCCTAGTGAGTTTGGTCAGT                    | Genomic screening of S051060<br>Transcript level of <i>IPMS2</i>                     |
| 2ipms2u <sup>b</sup>     | GGGGCTGCGTTTGCATAC                       | Genomic screening of S051060<br>Transcript level of <i>IPMS2</i>                     |
| 1ipms1g                  | AACTTGCTGACGCTGATGG                      | Transcript level of <i>IPMS1</i>                                                     |
| 2ipms1r                  | AAAAGAACCTAACTTCTGTCTGAC                 | Transcript level of <i>IPMS1</i>                                                     |
| act8R <sup>c</sup>       | GTTTTATCCGAGTTTGAAGAGGC                  | Transcript level of actin 8                                                          |
| act8F <sup>c</sup>       | ATGAAGATTAAGGTCGTGGCAC                   | Transcript level of actin 8                                                          |
| 1ipms1k <sup>c</sup>     | ATGGCGTCTTCGCTTCTGAG                     | Cloning <i>IPMS1</i> into pCR4-Topo                                                  |
| 2ipms1j <sup>c</sup>     | GGCAGCGACTCTGTTTTTTTG                    | Cloning <i>IPMS1</i> into pCR4-Topo;<br>Subcloning <i>IPMS1</i> into pCR-T7/CT-TOPO; |
| 1ipms2m <sup>c</sup>     | CTTACCACCGCCGAAAATT                      | Cloning <i>IPMS2</i> into pBAD-Topo;                                                 |
| 2ipms2n <sup>c</sup>     | GGCAGGGACTTCGTTGGTC                      | Cloning <i>IPMS2</i> into pBAD-Topo;<br>Subcloning <i>IPMS2</i> into pCR-T7/CT-TOPO  |
| 1ipms2m+atg <sup>c</sup> | ATGCTTACCACCGCCGAAAATT                   | Subcloning <i>IPMS2</i> into pCR-T7/CT-TOPO                                          |
| 1ipms1i+atg <sup>c</sup> | ATGTGCTCAATCTCAGATCCTTCTC                | Subcloning <i>IPMS1</i> into pCR-T7/CT-TOPO                                          |
| mut1-for <sup>d</sup>    | CTTCCAAGGAAAAAATTGACATCGCTCGTCAGC<br>TAG | Restoring point mutation in cDNA of <i>IPMS1</i>                                     |
| mut1-for-r <sup>d</sup>  | CTAGCTGACGAGCGATGTCAAGTTTTTCCTTGG<br>AAG | Restoring point mutation in cDNA of <i>IPMS1</i>                                     |
| IPMEff <sup>e</sup>      | CGCGGATCCAGCCAGCAAGTCATTATTTTCG          | Cloning <i>leuA</i> of <i>E. coli</i> into pET28a                                    |
| IPMErv <sup>e</sup>      | CCGCTCGAGCACGGTTTCCTTCTTGTTTTTCG         | Cloning <i>leuA</i> of <i>E. coli</i> into pET28a                                    |

<sup>a</sup>Standard salt-free primers from Operon (Huntsville, AL)

<sup>b</sup>Desalted and purified by gel filtration from Invitrogen (Carlsbad, CA)

<sup>c</sup>Standard purified primers from Jenabioscience (Jena, Germany)

<sup>d</sup>SDS-gel purified primers synthesized by Qiagen (Köln, Germany).

<sup>e</sup>HPLC purified primers synthesized by MWG (Ebersberg, Germany)
