# Supplementary material
Source: PubMed Central journal article supplement (PMC1803721)

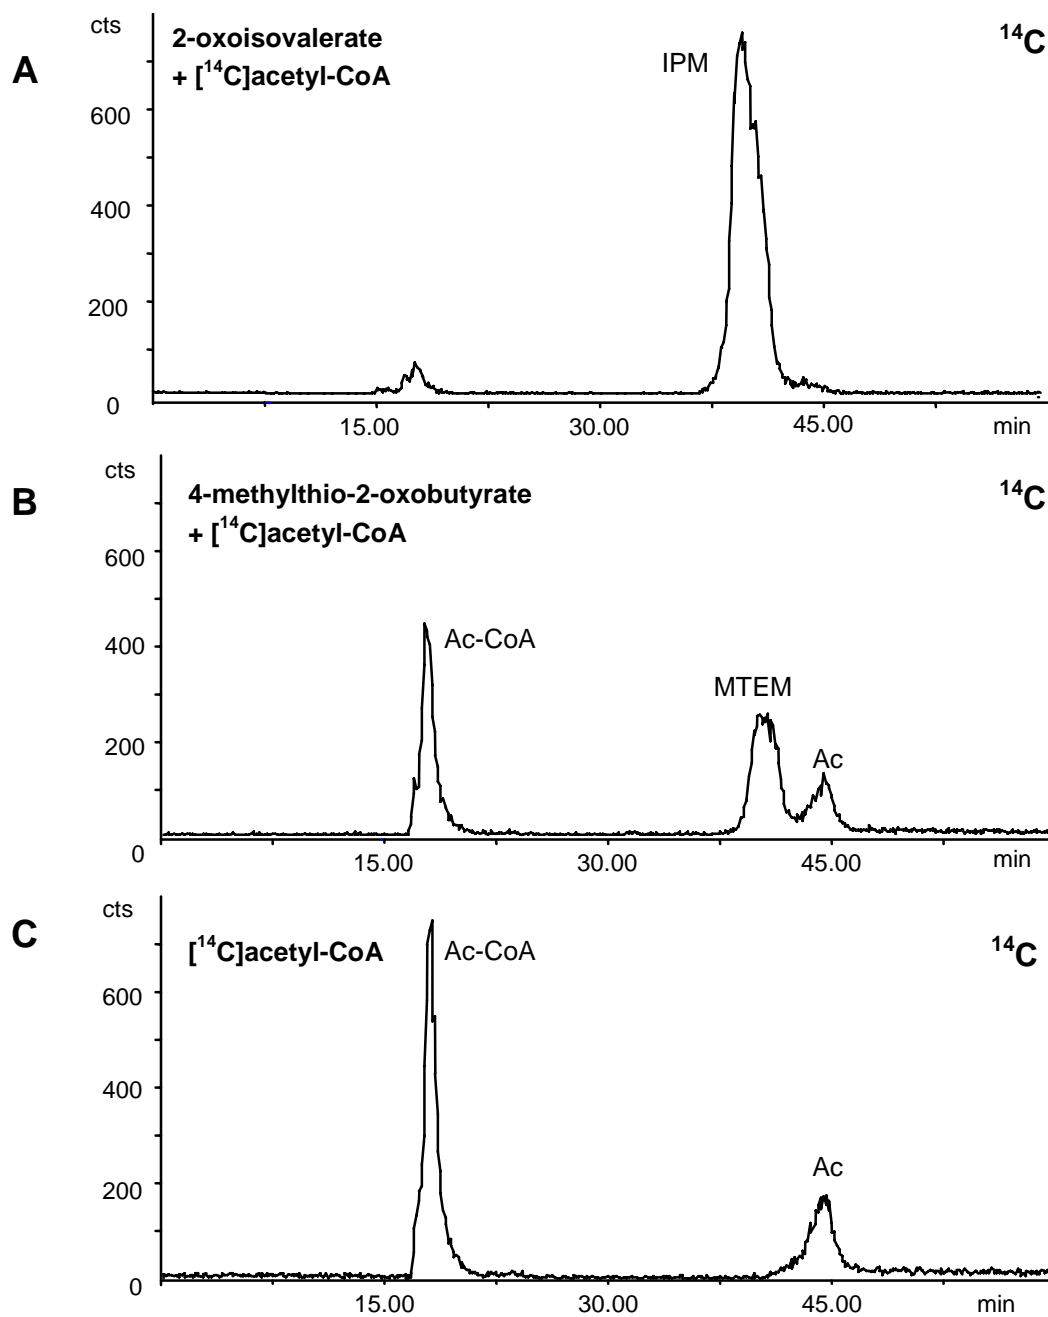

Sup Fig. 1

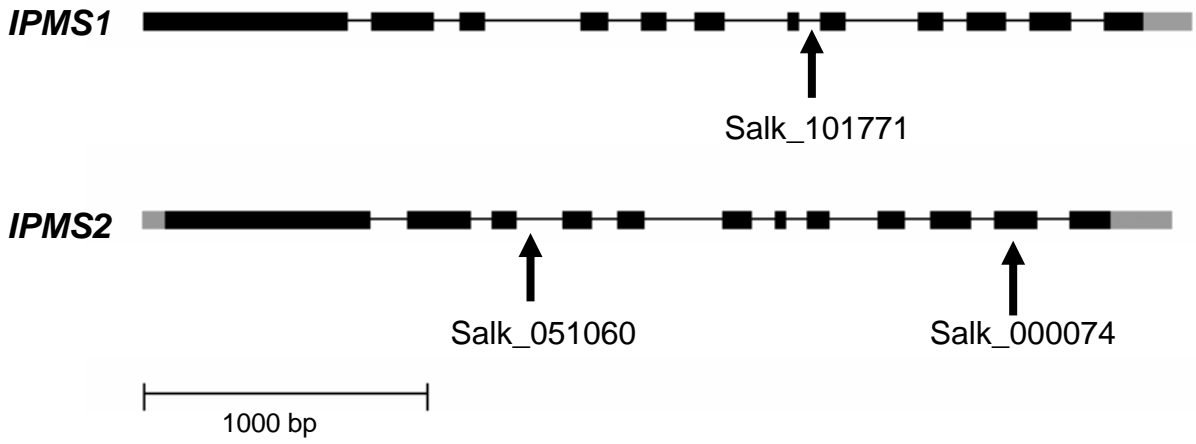

**A*****IPMS1***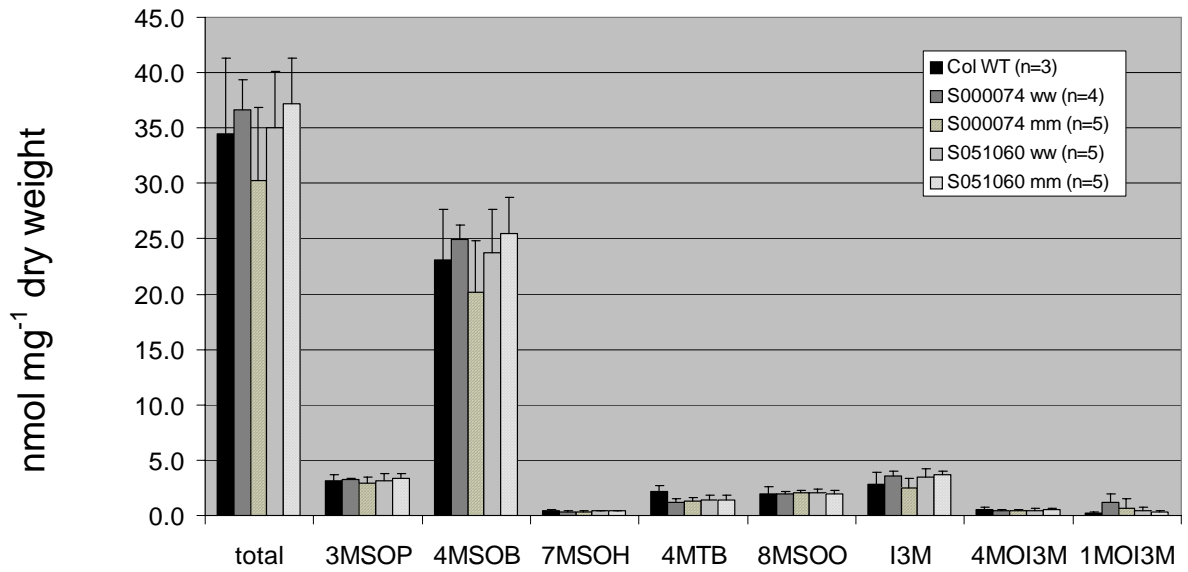**B*****IPMS2***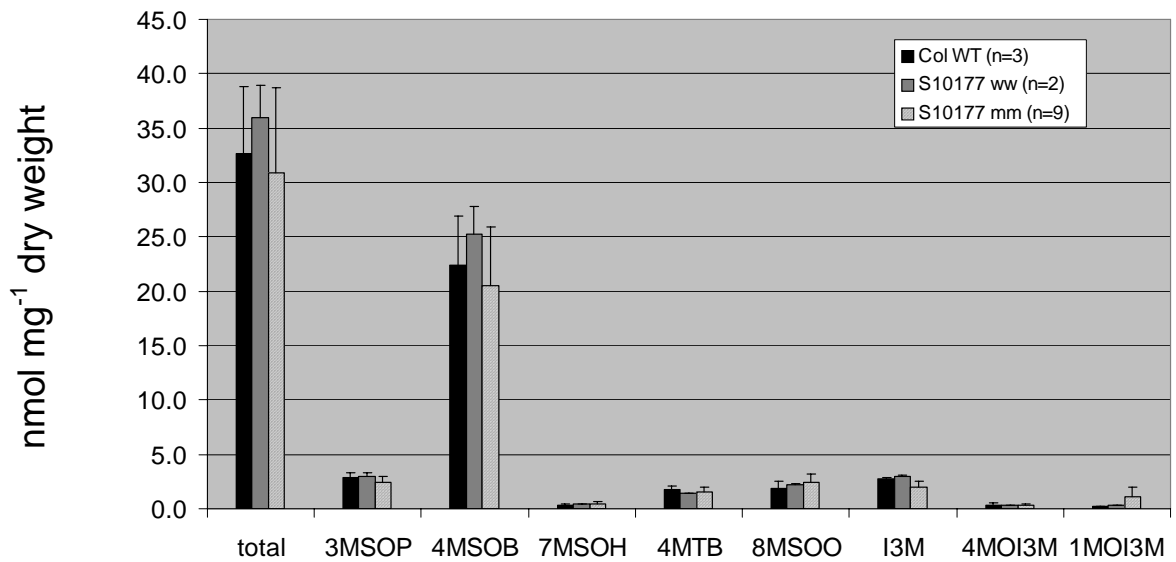

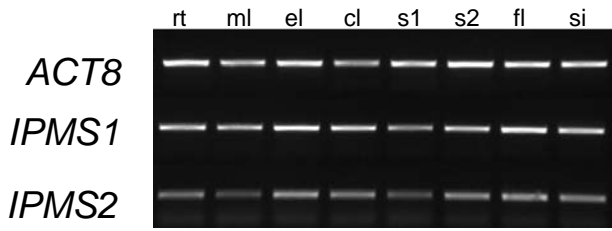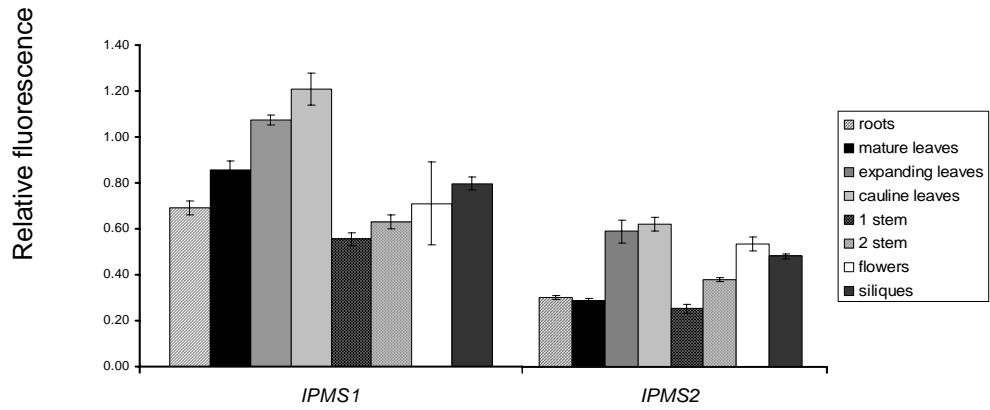

**A**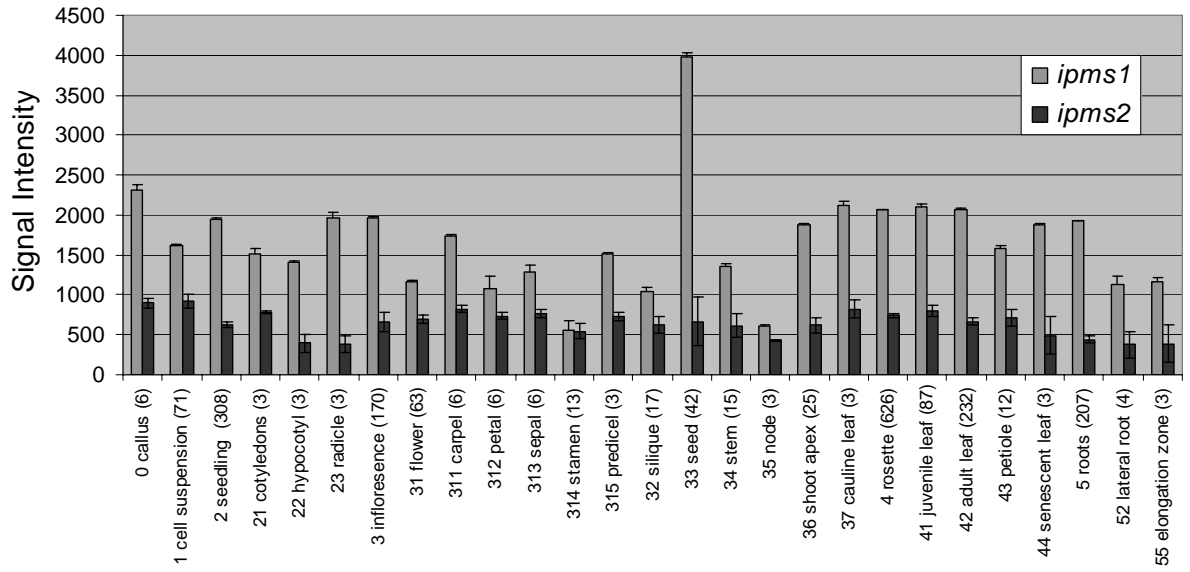**B**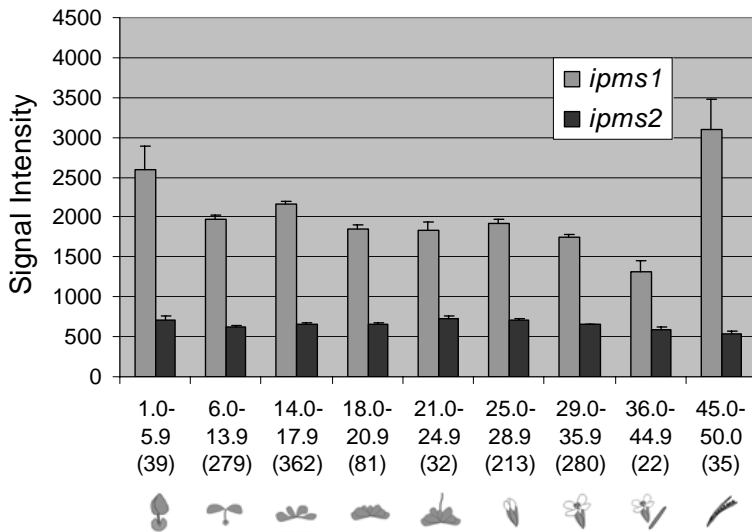

Supplement: plntphys_pp.106.085555_1.pdf [file plntphys_pp.106.085555_1.pdf]
